# Supplementary material for: Quantitative and Selective Analysis of Feline Growth Related Proteins Using Parallel Reaction Monitoring High Resolution Mass Spectrometry
Source: PLoS One. 2016 Dec 1;11(12):e0167138. doi: 10.1371/journal.pone.0167138 (PMC5132254; doi:10.1371/journal.pone.0167138)
Supplement: S1 File — The first sheet shows raw data, area under curve (AUC), of all fragments applied to record calibration curves. The following four sheets show statistical evaluation of IGF-I, IGF-II, IGFBP-3 and IGFBP-5, respectively. The SkyLine software was applied to extract AUC of the fragments and the built in tool Data Analysis in Microsoft Excel 2010 was used to perform linear regression and statistical evaluation. (XLSX) [file pone.0167138.s002.xlsx]

## Sheet: Raw data
IGF-I
GPETLCGAELVDALQFVCGDR
Native sample									IGF-I																				NEPTune conc
	y10 - 1180.5415+	y7 - 881.3934+	y6 - 753.3348+	y5 - 606.2664+	y4 - 507.1980+	b9 - 915.3877+				STD_1 (0,03 fmol/µl)	STD_1 (0,03 fmol/µl)	STD_1 (0,03 fmol/µl)	STD_2 (0.15fmol/µl)	STD_2 (0.15fmol/µl)	STD_2 (0.15fmol/µl)	STD_3 (0.3fmol/µl)	STD_3 (0.3fmol/µl)	STD_3 (0.3fmol/µl)	STD_4 (0,6 fmol/µl)	STD_4 (0,6 fmol/µl)	STD_4 (0,6 fmol/µl)	STD_5 (1.5 fmol/µl)	STD_5 (1.5 fmol/µl)	STD_5 (1.5 fmol/µl)	STD_6 (7.3 fmol/µl)	STD_6 (7.3 fmol/µl)	STD_6 (7.3 fmol/µl)		0.029	fmol/µL
Replicate	Peak Area	Peak Area	Peak Area	Peak Area	Peak Area	Peak Area	Sum		Ratio	5.56877	5.5096	5.51429	1.07025	1.05694	1.058	0.48167	0.515202	0.487815	0.313999	0.306996	0.321876	0.125991	0.125315	0.134153	0.0233461	0.0236811	0.0233883		0.145	fmol/µL
STD1_1	556443	1.7755e+06	3.30286e+06	1.88617e+06	1.79677e+06	1.03398e+06	1.03517e+07		Conc. Dil. sample	0.161494	0.159779	0.159914	0.155186	0.153256	0.15341	0.139684	0.149409	0.141466	0.184631	0.180513	0.189263	0.182686	0.181707	0.194521	0.169259	0.171688	0.169565	fmol/µL	0.29	fmol/µL
STD1_2	561279	1.83146e+06	3.49905e+06	1.8384e+06	1.88742e+06	1.10243e+06	1.072e+07		Conc. Sample	29.2305	28.9199	28.9445	28.0886	27.7394	27.7673	25.2828	27.043	25.6054	33.4183	32.6729	34.2566	33.0663	32.889	35.2084	30.6359	31.0756	30.6913	fmol/µL	0.588	fmol/µL
STD1_3	572662	1911487	3.41293e+06	2.01052e+06	1.96582e+06	1.12045e+06	1.09939e+07		Conc. Sample	223.584	221.208	221.397	214.85	212.178	212.392	193.388	206.852	195.856	255.617	249.915	262.029	252.924	251.568	269.309	234.334	237.697	234.758	ng/mL	1.45	fmol/µL
STD2_1	597177	1.89111e+06	3385990	1.93225e+06	1.90177e+06	1089506	1.07978e+07																						7.25	fmol/µL
STD2_2	546640	1.74648e+06	3.25841e+06	1.81784e+06	1.87551e+06	1.05233e+06	1.02972e+07																						Dilution
STD2_3	585340	1892998	3611079	1.94566e+06	1.92716e+06	1.19939e+06	1.11616e+07																						181
STD3_1	583019	1.82942e+06	3.0985e+06	1.93953e+06	1.93691e+06	1.02548e+06	1.04129e+07																						IGF 1 MW	7649
STD3_2	594023	1.84918e+06	3.48604e+06	1.93388e+06	1.94651e+06	1.05215e+06	1.08618e+07
STD3_3	596033	1913285	3.23368e+06	2.046e+06	1.99577e+06	1066881	1.08517e+07
STD4_1	569504	1.83121e+06	3.0981e+06	2.08737e+06	1.90424e+06	1.05258e+06	1.0543e+07
STD4_2	561987	1.8327e+06	3040126	1.95419e+06	1.94317e+06	966272	1.02984e+07
STD4_3	546285	1.78134e+06	2.9184e+06	2026327	1922778	902634	1.00978e+07
STD5_1	525801	1731111	2.78382e+06	2.18112e+06	1.80929e+06	863239	9.89438e+06
STD5_2	531424	1.81637e+06	2.96143e+06	1.96976e+06	1.90167e+06	933519	1.01142e+07
STD5_3	551013	1.91583e+06	3.52429e+06	2.01048e+06	1.96182e+06	1109210	1.10726e+07
STD6_1	617629	1.99222e+06	3.27153e+06	2176880	2.13728e+06	1.05234e+06	1.12479e+07
STD6_2	638307	2.02539e+06	3.31224e+06	2.40724e+06	2.11382e+06	1.06165e+06	1.15586e+07
STD6_3	528308	1.83878e+06	2.96528e+06	1885013	1.84607e+06	977179	1.00406e+07
Standard
	y10 - 1190.5498+	y7 - 891.4017+	y6 - 763.3431+	y5 - 616.2747+	y4 - 517.2063+	b9 - 915.3877+
Replicate	Peak Area	Peak Area	Peak Area	Peak Area	Peak Area	Peak Area	Sum
STD1_1	79139.3	332926	545975	349071	395976	155803	1.85889e+06
STD1_2	97563.8	342510	588242	346862	382688	187833	1.9457e+06
STD1_3	86776.8	359103	641462	343865	394204	168295	1.99371e+06
STD2_1	509243	1.83831e+06	3.17437e+06	1.7025e+06	1.97809e+06	886576	1.00891e+07
STD2_2	510076	1.70693e+06	3095805	1.6359e+06	1.91606e+06	877698	9.74248e+06
STD2_3	523733	1.90195e+06	3.3278e+06	1.74096e+06	2.10577e+06	949506	1.05497e+07
STD3_1	1.04783e+06	3982857	6811249	3.5006e+06	4.26037e+06	2015356	2.16183e+07
STD3_2	1.07296e+06	3.62043e+06	6493295	3592767	4274715	2.02838e+06	2.10825e+07
STD3_3	1082023	4072461	7014821	3753702	4408474	1.91395e+06	2.22454e+07
STD4_1	1.64286e+06	6.26794e+06	10538930	5610715	6.7196e+06	2.79646e+06	33576507
STD4_2	1.67912e+06	6.01447e+06	10526769	5581657	6.64573e+06	3.09814e+06	3.35459e+07
STD4_3	1.61327e+06	6079617	10042155	5444881	5.50638e+06	2685274	3.13716e+07
STD5_1	3.92241e+06	14960561	24639112	13258037	14918402	6834097	7.85326e+07
STD5_2	4.15369e+06	13900210	24836670	13695497	16378183	7745573	8.07098e+07
STD5_3	4.28199e+06	14117077	24106092	14481800	17230600	8320026	8.25376e+07
STD6_1	27684026	78452184	134711280	102845768	93264584	44830676	481788518
STD6_2	28083982	78728392	133621096	104944072	93484720	49232968	488095230
STD6_3	24921708	69181104	118459016	92459296	83961504	40318364	429300992
IGF-II
GIVEECCFR
Native sample
	y7 - 999.4023+	y6 - 900.3338+	y5 - 771.2913+	y4 - 642.2487+	y3 - 482.2180+	b3 - 270.1812+			IGF-II																				QPrEST konc.
Replicate	Peak Area	Peak Area	Peak Area	Peak Area	Peak Area	Peak Area	Sum			STD_1 (0.05fmol/µl)	STD_1 (0.05fmol/µl)	STD_1 (0.05fmol/µl)	STD_2 (0.25fmol/µl)	STD_2 (0.25fmol/µl)	STD_2 (0.25fmol/µl)	STD_3 (0.5fmol/µl)	STD_3 (0.5fmol/µl)	STD_3 (0.5fmol/µl)	STD_4 (1fmol/µl)	STD_4 (1fmol/µl)	STD_4 (1fmol/µl)	STD_5 (2.5 fmol/µl)	STD_5 (2.5 fmol/µl)	STD_5 (2.5 fmol/µl)	STD_6 (12.5 fmol/µl)	STD_6 (12.5 fmol/µl)	STD_6 (12.5 fmol/µl)		0.05	fmol/µL
STD1_1	880546	2.36277e+06	4168970	3.16729e+06	2.0339e+06	1.59043e+06	1.42039e+07		Ratio	35.0523	34.995	33.2348	7.14271	6.19859	6.63301	2.93516	3.17772	3.01179	1.71311	1.66758	1.7769	0.646741	0.665632	0.603086	0.127834	0.114319	0.123426		0.25	fmol/µL
STD1_2	879359	2.34885e+06	3.80724e+06	2.88217e+06	1.80589e+06	1.24867e+06	1.29722e+07		Conc. Dil. sample	1.75262	1.74975	1.66174	1.78568	1.54965	1.65825	1.46758	1.58886	1.5059	1.71311	1.66758	1.7769	1.61685	1.66408	1.50772	1.59792	1.42899	1.54282	fmol/µL	0.5	fmol/µL
STD1_3	835797	2356751	3.8367e+06	2.9412e+06	1.89269e+06	1.28614e+06	1.31493e+07		Conc. Sample	317.224	316.704	300.775	323.207	280.486	300.144	265.632	287.584	272.567	310.072	301.832	321.619	292.651	301.199	272.897	289.224	258.647	279.25	fmol/µL	1	fmol/µL
STD2_1	745982	2.22231e+06	3.67789e+06	3.02534e+06	1.9467e+06	1.32401e+06	1.29422e+07		Conc. Sample	2396.31	2392.38	2272.05	2441.51	2118.79	2267.29	2006.58	2172.41	2058.97	2342.29	2280.04	2429.51	2210.68	2275.25	2061.46	2184.8	1953.82	2109.46	ng/mL	2.5	fmol/µL
STD2_2	708783	2.0565e+06	3.46708e+06	2.79004e+06	1.78805e+06	1172830	1.19833e+07																						12.5	fmol/µL
STD2_3	762489	2.3333e+06	3.99573e+06	3.18226e+06	2131680	1.63862e+06	1.40441e+07																						Dilution
STD3_1	640591	2.35103e+06	3.9158e+06	3462243	2.11552e+06	1473534	1.39587e+07																						181
STD3_2	821111	2.43327e+06	4193505	3.42254e+06	2173745	1.54361e+06	1.45878e+07																						IGF 2 MW	7554
STD3_3	782338	2.27882e+06	3.79944e+06	3.31669e+06	2.01371e+06	1.40167e+06	1.35927e+07
STD4_1	716692	2.00133e+06	3.56628e+06	2.92503e+06	1.9993e+06	1.38684e+06	1.25955e+07
STD4_2	681543	2.10464e+06	3.32094e+06	2.73718e+06	2.09378e+06	1.45522e+06	1.23933e+07
STD4_3	729967	2125796	3.6898e+06	2.97179e+06	1.90547e+06	1.38239e+06	1.28052e+07
STD5_1	590874	1870543	3.21661e+06	2.65682e+06	2.00271e+06	1.18814e+06	1.15257e+07
STD5_2	601113	1935065	3.09085e+06	2.60619e+06	1.6682e+06	1.08929e+06	1.09907e+07
STD5_3	594431	1.79709e+06	3020343	2.53738e+06	1.74829e+06	1281583	1.09791e+07
STD6_1	702793	2.29251e+06	3.78208e+06	2880470	2199348	1.44809e+06	1.33053e+07
STD6_2	649941	1.9835e+06	3384208	2.9243e+06	2.24187e+06	1.57164e+06	1.27555e+07
STD6_3	733067	1.98283e+06	3.38168e+06	2.74071e+06	2056702	1.38347e+06	1.22785e+07
Standard
	y7 - 1009.4105+	y6 - 910.3421+	y5 - 781.2995+	y4 - 652.2569+	y3 - 492.2263+	b3 - 270.1812+
Replicate	Peak Area	Peak Area	Peak Area	Peak Area	Peak Area	Peak Area	Sum
STD1_1	0	51669	121243	108561	39464.2	84282.3	405220
STD1_2	0	79985.1	95202.3	76416.4	37814.3	81268.5	370687
STD1_3	0	64603.9	108175	95468.7	48691.2	78710	395648
STD2_1	93183	281937	530126	411850	259487	235368	1.81195e+06
STD2_2	96049.9	347007	561190	483327	250518	195137	1.93323e+06
STD2_3	100881	356345	607958	531504	288386	232225	2.1173e+06
STD3_1	260451	859290	1.39613e+06	1.16658e+06	637848	435403	4.7557e+06
STD3_2	239274	801382	1359453	1.10847e+06	616494	465562	4.59064e+06
STD3_3	233017	792276	1.38706e+06	1.10734e+06	590635	402821	4.51315e+06
STD4_1	345742	1.25808e+06	2.14636e+06	1.77601e+06	1.01436e+06	811856	7.35242e+06
STD4_2	402083	1.31615e+06	2155866	1.76904e+06	922973	865804	7.43191e+06
STD4_3	369153	1.21417e+06	2.15907e+06	1.82809e+06	969132	666876	7.20649e+06
STD5_1	866222	3073567	5268415	4310194	2.37482e+06	1.92797e+06	17821188
STD5_2	876750	2.92855e+06	5.06335e+06	3953462	2.08536e+06	1.60421e+06	1.65117e+07
STD5_3	841751	3.07349e+06	5.56529e+06	4405567	2.45127e+06	1.86752e+06	1.82049e+07
STD6_1	5.38925e+06	17678902	30990592	25201196	13649951	11172881	1.04083e+08
STD6_2	5.54875e+06	19121142	33060218	27782080	14815209	11250222	1.11578e+08
STD6_3	5154484	16907686	30749704	24345752	12824885	9498094	99480605
IGFBP-3
ETEYGPCR
Native sample
	y5 - 652.2872+	y4 - 489.2238+	y2 - 335.1496+						IGFBP-3																				QPrEST konc.
Replicate	Peak Area	Peak Area	Peak Area				Sum			STD_1 (0.05fmol/µl)	STD_1 (0.05fmol/µl)	STD_1 (0.05fmol/µl)	STD_2 (0.25fmol/µl)	STD_2 (0.25fmol/µl)	STD_2 (0.25fmol/µl)	STD_3 (0.5fmol/µl)	STD_3 (0.5fmol/µl)	STD_3 (0.5fmol/µl)	STD_4 (1fmol/µl)	STD_4 (1fmol/µl)	STD_4 (1fmol/µl)	STD_5 (2.5 fmol/µl)	STD_5 (2.5 fmol/µl)	STD_5 (2.5 fmol/µl)	STD_6 (12.5 fmol/µl)	STD_6 (12.5 fmol/µl)	STD_6 (12.5 fmol/µl)		0.05	fmol/µL
STD1_1	441677	2.828e+06	94061.9				3.36374e+06		Ratio	43.2065	58.6337	64.9982	14.2107	11.0906	14.0239	3.32063	4.74311	4.06819	2.88593	2.67338	3.31368	0.567813	0.959973	0.859395	0.140604	0.179642	0.147152		0.25	fmol/µL
STD1_2	239518	2.83716e+06	77815.9				3.1545e+06		Conc. Dil. sample	2.16033	2.93168	3.24991	3.55267	2.77264	3.50599	1.66032	2.37155	2.0341	2.88593	2.67338	3.31368	1.41953	2.39993	2.14849	1.75754	2.24553	1.8394	fmol/µL	0.5	fmol/µL
STD1_3	304601	3059646	132661				3.49691e+06		Conc. Sample	391.019	530.635	588.233	643.033	501.848	634.584	300.517	429.251	368.171	522.353	483.882	599.776	256.935	434.388	388.876	318.115	406.44	332.931	fmol/µL	1	fmol/µL
STD2_1	165236	2.55781e+06	151351				2.8744e+06		Conc. Sample	7034.82	9546.65	10582.9	11568.8	9028.76	11416.8	5406.61	7722.66	6623.77	9397.65	8705.52	10790.6	4622.53	7815.07	6996.27	5723.22	7312.26	5989.76	ng/mL	2.5	fmol/µL
STD2_2	220374	2.93981e+06	282715				3.4429e+06																						12.5	fmol/µL
STD2_3	250212	2953282	263323				3.46682e+06																						Dilution
STD3_1	597471	2.85952e+06	387373				3.84436e+06																						181
STD3_2	502531	3.57862e+06	192273				4.27343e+06																						IGFBP 3 MW	17991
STD3_3	497246	3483017	266111				4.24637e+06
STD4_1	174341	2400407	188199				2.76295e+06
STD4_2	236688	2.54047e+06	182261				2.95942e+06
STD4_3	110885	2960910	143124				3.21492e+06
STD5_1	142235	1.45128e+06	63142.3				1.65665e+06
STD5_2	240887	2.61675e+06	56630.5				2.91427e+06
STD5_3	137009	2327117	0				2.46413e+06
STD6_1	84439.6	2.51874e+06	186402				2.78959e+06
STD6_2	147941	3.36888e+06	187499				3.70432e+06
STD6_3	269928	2.61425e+06	143497				3.02768e+06
Standard
	y5 - 662.2954+	y4 - 499.2321+	y2 - 345.1579+
Replicate	Peak Area	Peak Area	Peak Area				Sum
STD1_1	51124.3	23488.9	3239.41				77852.6
STD1_2	31108.1	42728.1	0				73836.2
STD1_3	18031.1	35769	0				53800.1
STD2_1	47248	155022	0				202270
STD2_2	66552.7	235889	7993.61				310435
STD2_3	0	239868	7339.08				247207
STD3_1	166842	949391	41486.1				1.15772e+06
STD3_2	154045	695660	51270.6				900976
STD3_3	142248	873397	28154.3				1.0438e+06
STD4_1	147998	780222	29166.4				957387
STD4_2	133902	895179	77915				1.107e+06
STD4_3	129775	788874	51546.7				970195
STD5_1	359427	2.35122e+06	206958				2.91761e+06
STD5_2	402488	2466233	167060				3.03578e+06
STD5_3	419151	2.22425e+06	223878				2.86728e+06
STD6_1	3.31718e+06	14563845	1.95907e+06				1.98401e+07
STD6_2	3.78243e+06	14661108	2177048				2.06206e+07
STD6_3	3.9276e+06	14603011	2.04459e+06				2.05752e+07
IGFBP-5
FVGGAENTAHPR, 419,2108
Native sample
	y6 - 695.3583+	y5 - 581.3154+	y4 - 480.2677+	y3 - 409.2306+	b2 - 247.1441+				IGFBP-5																				QPrEST konc.
Replicate	Peak Area	Peak Area	Peak Area	Peak Area	Peak Area		Sum			STD_1 (0.05fmol/µl)	STD_1 (0.05fmol/µl)	STD_1 (0.05fmol/µl)	STD_2 (0.25fmol/µl)	STD_2 (0.25fmol/µl)	STD_2 (0.25fmol/µl)	STD_3 (0.5fmol/µl)	STD_3 (0.5fmol/µl)	STD_3 (0.5fmol/µl)	STD_4 (1fmol/µl)	STD_4 (1fmol/µl)	STD_4 (1fmol/µl)	STD_5 (2.5 fmol/µl)	STD_5 (2.5 fmol/µl)	STD_5 (2.5 fmol/µl)	STD_6 (12.5 fmol/µl)	STD_6 (12.5 fmol/µl)	STD_6 (12.5 fmol/µl)		0.05	fmol/µL
STD1_1	121210	409471	120214	132609	96053.7		879558		Ratio	0.714243	0.511793	0.660544	0.357766	0.145678	0.242353	0.228847	0.487045	0.237995	0.0867764	0.081085	0.0968743	0.112684	0.116555	0.0892824	0.0135684	0.0170921	0.0145092	fmol/µL	0.25	fmol/µL
STD1_2	151401	377119	232966	147245	101888		1.01062e+06		Conc. Dil. sample	0.0357121	0.0255897	0.0330272	0.0894414	0.0364195	0.0605882	0.114424	0.243523	0.118998	0.0867764	0.081085	0.0968743	0.281709	0.291387	0.223206	0.169605	0.213652	0.181365	fmol/µL	0.5	fmol/µL
STD1_3	0	0	5577.1	4.86755	141728		147310		Conc. Sample	6.4639	4.63173	5.97792	16.1889	6.59192	10.9665	20.7107	44.0776	21.5386	15.7065	14.6764	17.5343	50.9893	52.741	40.4003	30.6985	38.671	32.827	ng/mL	1	fmol/µL
STD2_1	0	0	0	0	164611		164611		Conc. Sample	195.94	140.402	181.209	490.734	199.821	332.427	627.802	1336.12	652.899	476.112	444.885	531.516	1545.64	1598.74	1224.65	930.563	1172.23	995.086		2.5	fmol/µL
STD2_2	74622.5	452118	94415	75728.2	49216		746099	Outlier																					12.5	fmol/µL
STD2_3	0	0	0	773.865	123863		124637																						Dilution
STD3_1	0	0	0	0	164375		164375																						181
STD3_2	0	0	0	0	210779		210779	Outlier																					IGFBP 3 MW	30313
STD3_3	0	0	0	0	172370		172370
STD4_1	0	0	0	0	77195.9		77195.9
STD4_2	0	0	0	1939.8	74247.1		76186.9
STD4_3	0	0	2361.53	0	86735.2		89096.7
STD5_1	0	0	35203.5	52852.1	103734		191789
STD5_2	0	16635.4	41454.2	64657.5	80172		202919
STD5_3	0	3155.56	41282.7	56179.7	68381		168999
STD6_1	0	0	0	0	145790		145790
STD6_2	0	0	15299.7	0	196418		211718
STD6_3	519619	686829	691216	418036	303229		2.61893e+06	Outlier
Standard
	y6 - 705.3666+	y5 - 591.3237+	y4 - 490.2760+	y3 - 419.2389+	b2 - 247.1441+
Replicate	Peak Area	Peak Area	Peak Area	Peak Area	Peak Area		Sum
STD1_1	332502	255002	300686	217749	125518		1.23146e+06
STD1_2	514229	323929	511916	398775	225813		1.97466e+06
STD1_3	0	0	0	223014	0		223014
STD2_1	0	49207.1	45174.7	0	365727		460109
STD2_2	1315922	858094	1348164	1023561	575828		5.12157e+06	Outlier
STD2_3	0	54420.9	23522.4	15711.4	420625		514279
STD3_1	0	89178.7	83920.1	55669	489508		718276
STD3_2	0	62205.8	44017.9	21180.5	305367		432771
STD3_3	0	98802.8	125537	30290.4	469629		724259
STD4_1	0	228318	185792	95289	380196		889596
STD4_2	0	234262	200915	84344.7	420070		939592
STD4_3	8392.23	238834	145947	100763	425778		919714
STD5_1	23613.3	627070	377416	231996	441924		1.70202e+06
STD5_2	0	548219	430969	263196	498593		1.74098e+06
STD5_3	17636.3	676940	429319	263834	505129		1.89286e+06
STD6_1	365525	4579143	2599473	1825999	1374668		1.07448e+07
STD6_2	512881	5000845	3044077	2060433	1768609		1.23868e+07	Outlier
STD6_3	47822716	35083300	46635252	32558692	18401564		180501524	Outlier

## Sheet: IGF I LOD & LOQ
Conc.	Ratio
0.029	0.179573					LOD:	0.0429852	7.78032	fmol/µL
0.029	0.181501					LOQ:	0.143284	25.9344	fmol/µL
0.029	0.181347
0.145	0.934365		SUMMARY OUTPUT
0.145	0.946128
0.145	0.945177		Regression Statistics
0.29	2.07611		Multiple R	0.997388
0.29	1.94099		R Square	0.994784
0.29	2.04996		Adjusted R Square	0.994382
0.58	3.18472		Standard Error	0.208259
0.58	3.25737		Observations	15
0.58	3.10679
1.45	7.9371		ANOVA
1.45	7.97987			df	SS	MS	F	Significance F
1.45	7.45419		Regression	1	107.524	107.524	2479.13	3.16613e-16
			Residual	13	0.563832	0.0433717
			Total	14	108.088
				Coefficients	Standard Error	t Stat	P-value	Lower 95%	Upper 95%	Lower 95.0%	Upper 95.0%
			Intercept	0.205473	0.0752099	2.732	0.0171164	0.0429922	0.367954	0.0429922	0.367954
			X Variable 1	5.24901	0.105421	49.7909	3.16613e-16	5.02126	5.47676	5.02126	5.47676
			RESIDUAL OUTPUT
			Observation	Predicted Y	Residuals
			1	0.357695	-0.178122
			2	0.357695	-0.176193
			3	0.357695	-0.176348
			4	0.96658	-0.0322145
			5	0.96658	-0.0204512
			6	0.96658	-0.0214028
			7	1.72769	0.348426
			8	1.72769	0.2133
			9	1.72769	0.322272
			10	3.2499	-0.0651757
			11	3.2499	0.00747572
			12	3.2499	-0.143113
			13	7.81654	0.120559
			14	7.81654	0.163332
			15	7.81654	-0.362346

## Sheet: IGF II LOD & LOQ
Conc.	Ratio
0.05	0.0285288					LOD:	0.0683902	12.3786	fmol/µL
0.05	0.0285755					LOQ:	0.227967	41.2621	fmol/µL
0.05	0.030089
0.25	0.140003		SUMMARY OUTPUT
0.25	0.161327
0.25	0.150761		Regression Statistics
0.5	0.340697		Multiple R	0.997775
0.5	0.314691		R Square	0.995555
0.5	0.332028		Adjusted R Square	0.995213
1	0.583735		Standard Error	0.0395125
1	0.599672		Observations	15
1	0.562779
2.5	1.54621		ANOVA
2.5	1.50233			df	SS	MS	F	Significance F
2.5	1.65814		Regression	1	4.54531	4.54531	2911.35	1.1192e-16
			Residual	13	0.0202961	0.00156124
			Total	14	4.56561
				Coefficients	Standard Error	t Stat	P-value	Lower 95%	Upper 95%	Lower 95.0%	Upper 95.0%
			Intercept	-0.00633887	0.0142694	-0.444228	0.664183	-0.0371661	0.0244884	-0.0371661	0.0244884
			X Variable 1	0.625942	0.0116008	53.9569	1.1192e-16	0.60088	0.651004	0.60088	0.651004
			RESIDUAL OUTPUT
			Observation	Predicted Y	Residuals
			1	0.0249582	0.00357054
			2	0.0249582	0.00361733
			3	0.0249582	0.00513075
			4	0.150147	-0.0101437
			5	0.150147	0.0111803
			6	0.150147	0.000614405
			7	0.306632	0.0340651
			8	0.306632	0.00805864
			9	0.306632	0.0253962
			10	0.619603	-0.0358681
			11	0.619603	-0.0199311
			12	0.619603	-0.0568245
			13	1.55852	-0.0123031
			14	1.55852	-0.0561846
			15	1.55852	0.0996217

## Sheet: IGFBP-3 LOD & LOQ
Conc.	Ratio
0.05	0.0231447					LOD:	0.153141	27.7185	fmol/µL
0.05	0.0234066					LOQ:	0.510469	92.3949	fmol/µL
0.05	0.0153851
0.25	0.0703696		SUMMARY OUTPUT
0.25	0.0901667
0.25	0.0713066		Regression Statistics
0.5	0.301147		Multiple R	0.98695
0.5	0.210832		R Square	0.97407
0.5	0.24581		Adjusted R Square	0.971909
1	0.346509		Standard Error	0.0605597
1	0.374058		Observations	14
1	0.301779
2.5	1.0417		ANOVA
2.5	1.16361			df	SS	MS	F	Significance F
			Regression	1	1.65323	1.65323	450.782	6.93462e-11
One point withdrown due to very bad peak for nartive sample (Outlier)			Residual	12	0.0440098	0.00366748
			Total	13	1.69724
				Coefficients	Standard Error	t Stat	P-value	Lower 95%	Upper 95%	Lower 95.0%	Upper 95.0%
			Intercept	-0.01781	0.0222278	-0.80125	0.438565	-0.0662402	0.0306202	-0.0662402	0.0306202
			X Variable 1	0.435439	0.020509	21.2316	6.93462e-11	0.390753	0.480124	0.390753	0.480124
			RESIDUAL OUTPUT
			Observation	Predicted Y	Residuals
			1	0.00396191	0.0191828
			2	0.00396191	0.0194447
			3	0.00396191	0.0114231
			4	0.0910496	-0.02068
			5	0.0910496	-0.000882952
			6	0.0910496	-0.019743
			7	0.199909	0.101238
			8	0.199909	0.010923
			9	0.199909	0.0459003
			10	0.417628	-0.0711192
			11	0.417628	-0.0435701
			12	0.417628	-0.115849
			13	1.07079	-0.02909
			14	1.07079	0.0928229
			15	1.27686	-0.113255

## Sheet: IGFBP-5 LOD & LOQ
Conc.	Ratio
0.05	1.40008					LOD:	0.154452	27.9558	fmol/µL
0.05	1.95391					LOQ:	0.51484	93.186	fmol/µL
0.05	1.5139
0.25	2.79513		SUMMARY OUTPUT
0.25	4.12622
0.5	4.36973		Regression Statistics
0.5	4.20176		Multiple R	0.972031
1	11.5239		R Square	0.944844
1	12.3327		Adjusted R Square	0.93795
1	10.3227		Standard Error	1.0622
			Observations	10
			ANOVA
				df	SS	MS	F	Significance F
			Regression	1	154.623	154.623	137.044	2.58838e-06
			Residual	8	9.02618	1.12827
			Total	9	163.65
				Coefficients	Standard Error	t Stat	P-value	Lower 95%	Upper 95%	Lower 95.0%	Upper 95.0%
			Intercept	0.685354	0.527976	1.29808	0.230432	-0.532161	1.90287	-0.532161	1.90287
			X Variable 1	10.2552	0.876015	11.7066	2.58838e-06	8.23506	12.2752	8.23506	12.2752
			RESIDUAL OUTPUT
			Observation	Predicted Y	Residuals
			1	1.19811	0.201973
			2	1.19811	0.755802
			3	1.19811	0.315793
			4	3.24914	-0.454016
			5	3.24914	0.877073
			6	5.81293	-1.4432
			7	5.81293	-1.61117
			8	10.9405	0.583365
			9	10.9405	1.39223
			10	10.9405	-0.617853
			11	10.5977	1.73501
			12	10.5977	-0.275075
			13	67.232	6.46872
			14	67.232	-8.72554
			15	67.232	1.68989
